# Supplementary material for: A Longitudinal Study of a Multicomponent Exercise Intervention with Remote Guidance among Breast Cancer Patients
Source: PubMed Central journal article supplement (PMC7277866; doi:10.3390/ijerph17103425), 2020-05-14
Supplement: ijerph-17-03425-s001.pdf [file ijerph-17-03425-s001.pdf]

**Supplementary Table 1: Quality of life, Physical Activity (PA) Estimates, Muscle strength and Cardiopulmonary endurance at 12 weeks.**

| Variables | Group | 12 weeks Mean (SD) | Variables      | Group | 12 Weeks Mean (SD) |
|-----------|-------|--------------------|----------------|-------|--------------------|
| SF-36     |       |                    |                |       |                    |
| PF        | ME    | 86.52 (8.04)       | SPSDCT         | ME    | 19.35 (4.53)       |
|           | UC    | 85.95 (11.36)      |                | UC    | 16.14 (2.97)       |
| RP        | ME    | 58.70 (37.39)      | ALT            | ME    | 20.70 (4.04)       |
|           | UC    | 51.19 (42.92)      |                | UC    | 19.90 (3.69)       |
| BP        | ME    | 76.52 (13.69)      | VO2max         | ME    | 52.72 (9.78)       |
|           | UC    | 79.52 (17.17)      |                | UC    | 45.77 (15.20)      |
| GH        | ME    | 72.43 (17.39)      | PA Estimates   |       |                    |
|           | UC    | 63.10 (18.46)      | Social support | ME    | 17.39 (5.37)       |
| VT        | ME    | 67.17 (6.18)       |                | UC    | 14.38 (4.27)       |
|           | UC    | 63.10 (9.15)       | PA hinder      | ME    | 23.48 (6.62)       |
| SF        | ME    | 94.57 (17.61)      |                | UC    | 28.81 (4.40)       |
|           | UC    | 94.05 (21.51)      | EA             | ME    | 36.57 (5.69)       |
| RE        | ME    | 75.36 (35.13)      |                | UC    | 36.24 (2.12)       |
|           | UC    | 69.84 (39.31)      | PA enjoyment   | ME    | 18.91 (2.23)       |
| MH        | ME    | 54.09 (4.95)       |                | UC    | 18.95 (2.22)       |
|           | UC    | 50.48 (5.58)       | Self-efficacy  | ME    | 74.57 (19.39)      |
| HT        | ME    | 4.30 (0.97)        |                | UC    | 57.67 (23.81)      |
|           | UC    | 3.90 (0.83)        |                |       |                    |

SD, standard deviation; CI, confidence interval; ME, multicomponent exercise group; UC, usual care group; SF-36, the Mos 36-item Short Form Health Survey; PF, Physical Functioning; RP, Role-Physical; BP, Bodily Pain; GH, General Health; VT, Vitality; SF, Social Functioning; RE, Role-Emotional; MH, Mental Health; HT, Reported Health Transition; EA, Expected accomplishments; VO2, max maximal oxygen uptake; SPSDCT, Stand-up and sit-down chair test (number of times standing up from the chair within 30 s); ALT, Arm lifting test (30 s dumb bell of 5 pounds or 2.3 kg lifting test).
